# Supplementary material for: Misreporting of height and weight by primary school children in Japan: a cross-sectional study on individual and environmental determinants
Source: PubMed Central journal article supplement (PMC10134671; doi:10.1186/s12889-023-15682-z), 2023-04-27
Supplement: 12889_2023_15682_MOESM1_ESM.pdf [file 12889_2023_15682_MOESM1_ESM.pdf]

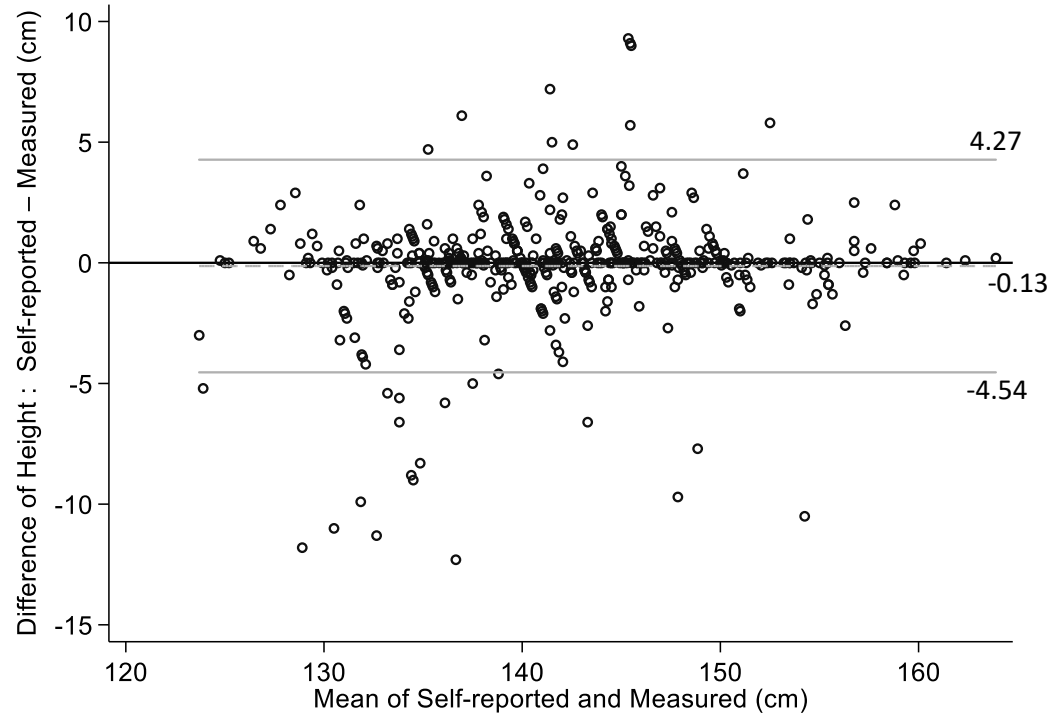

(a) Height

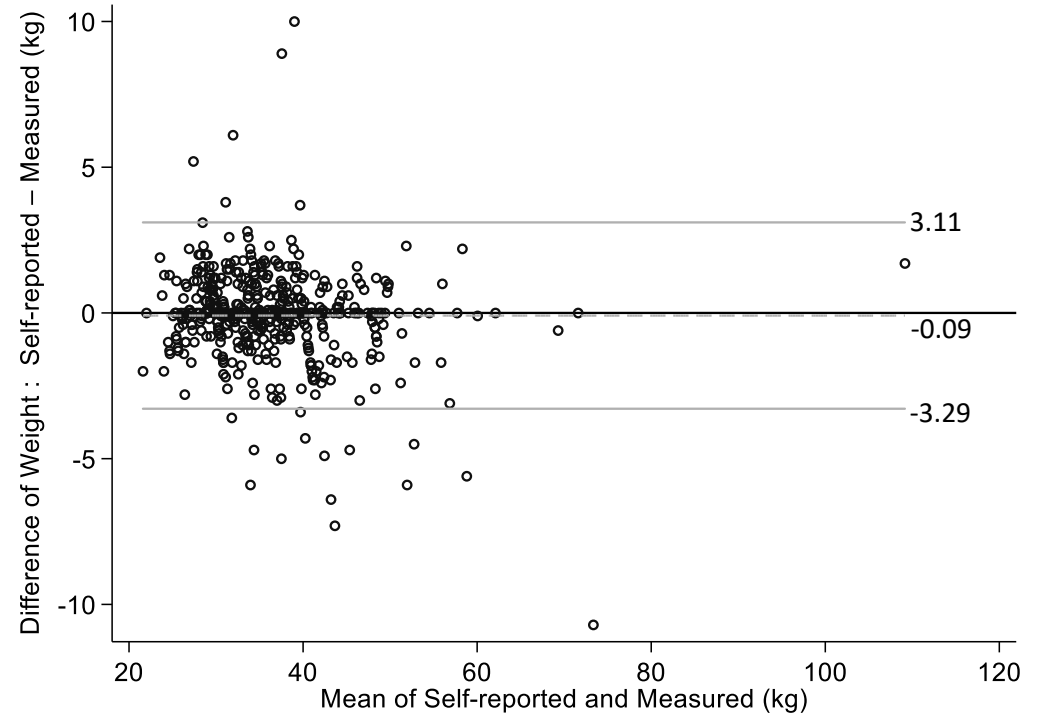

(b) Weight

**Supplementary Figure 1.** Agreement between self-reported and measured height/weight for the boys (Bland-Altman plots).

Dashed line shows the mean difference between self-reported and measured height/weight. Horizontal lines represent 95% limits of agreement.
