# Supplementary material for: Misreporting of height and weight by primary school children in Japan: a cross-sectional study on individual and environmental determinants
Source: PubMed Central journal article supplement (PMC10134671; doi:10.1186/s12889-023-15682-z), 2023-04-27
Supplement: 12889_2023_15682_MOESM3_ESM.pdf [file 12889_2023_15682_MOESM3_ESM.pdf]

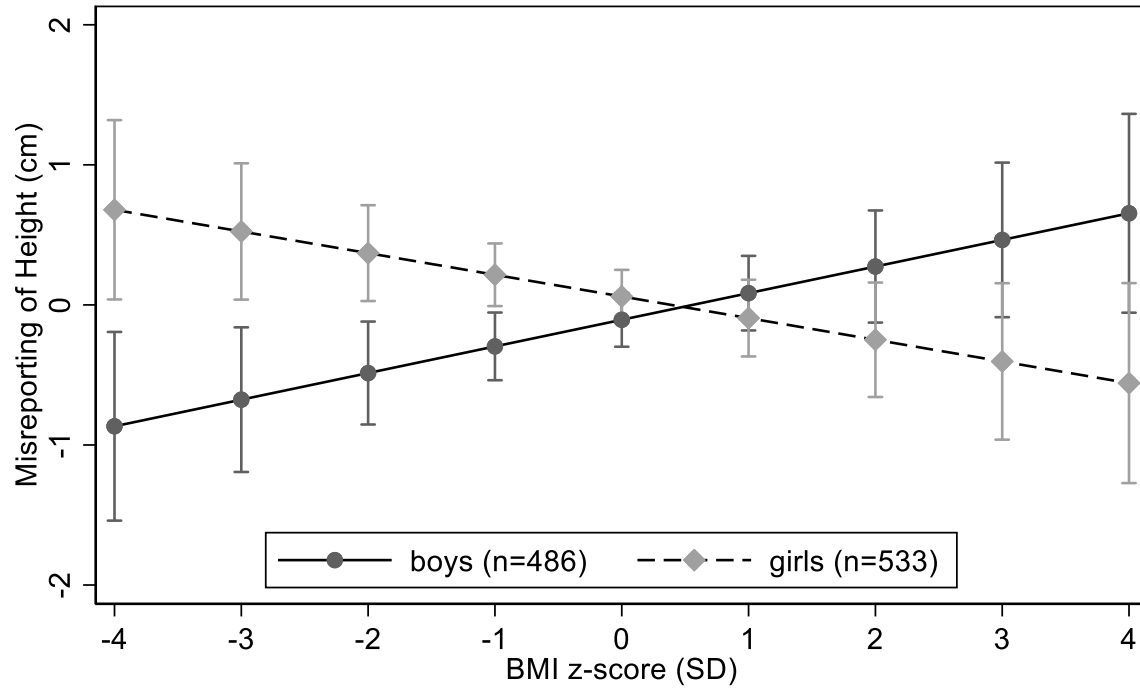

(a) Height misreporting

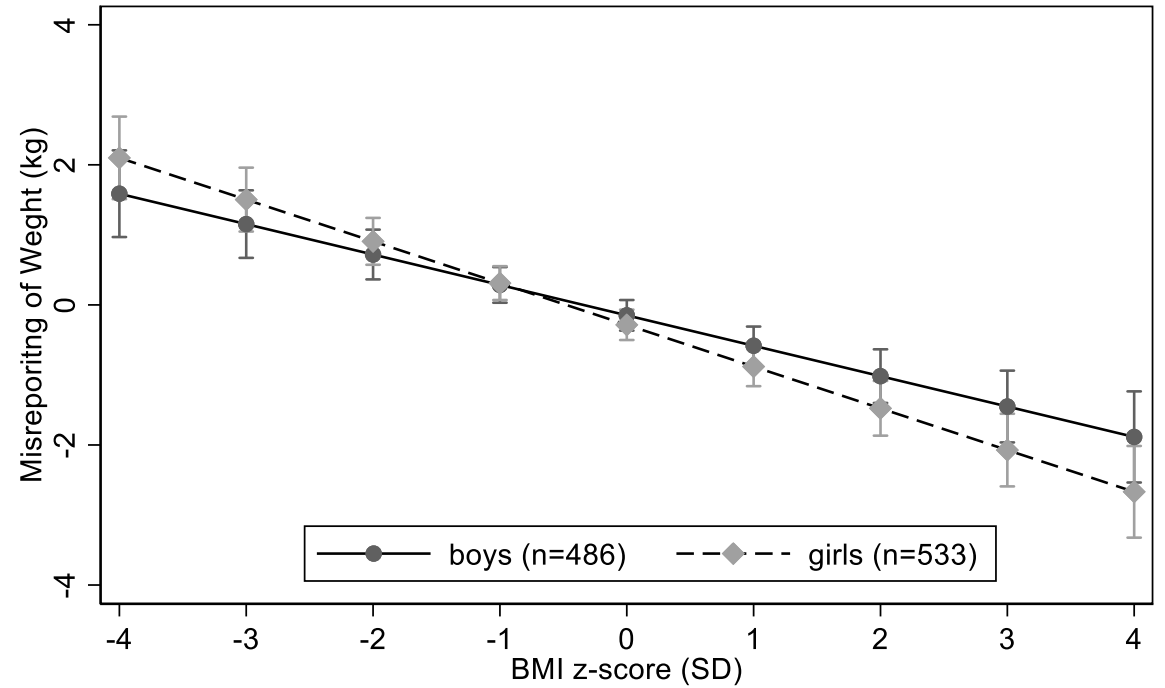

(b) Weight misreporting

**Supplementary Figure 3.** Association between height/weight misreporting and BMI z-score by SEX

(a) Adjusted Predictions of Height misreporting by SEX with 95% CIs

(b) Adjusted Predictions of Weight misreporting by SEX with 95% CIs

BMI: body mass index ; CI: confidence interval ; SD: standard deviation
