# Supplementary material for: Misreporting of height and weight by primary school children in Japan: a cross-sectional study on individual and environmental determinants
Source: PubMed Central journal article supplement (PMC10134671; doi:10.1186/s12889-023-15682-z), 2023-04-27
Supplement: 12889_2023_15682_MOESM4_ESM.pdf [file 12889_2023_15682_MOESM4_ESM.pdf]

**Supplementary table 1** Agreement between self-awareness of weight and measured body constitution (n=1019)

| Sex           | Measured body constitution <sup>a</sup> | Self-awareness of weight n(%) |            |           | Kappa <sup>b</sup> |
|---------------|-----------------------------------------|-------------------------------|------------|-----------|--------------------|
|               |                                         | Light                         | Adequate   | Heavy     |                    |
| Boys (n=486)  | Underweight                             | 37 (61.7)                     | 23 (38.3)  | 0 (0)     | 0.467 (P<0.001)    |
|               | Normal weight                           | 40 (11.2)                     | 267 (74.8) | 50 (14.0) |                    |
|               | Overweight                              | 0 (0)                         | 14 (20.3)  | 55 (79.7) |                    |
| Girls (n=533) | Underweight                             | 34 (47.9)                     | 36 (50.7)  | 1 (1.4)   | 0.364 (P<0.001)    |
|               | Normal weight                           | 35 (8.6)                      | 302 (74.6) | 68 (16.8) |                    |
|               | Overweight                              | 0 (0)                         | 15 (26.3)  | 42 (73.7) |                    |

<sup>a</sup> The cutoff values for underweight and overweight were <BMI18.5 and ≥BMI25 at age 18, respectively.

<sup>b</sup> Kappa coefficient was calculated according to Szklo M, Nieto FJ. Epidemiology Beyond the Basics
